# 1                    **Three-dimensional morphodynamics simulations of** 2                    **macropinocytic cups**

3  
4                    Nen Saito<sup>1</sup>, Satoshi Sawai<sup>2,3,4</sup>

5                    1 Universal Biological Institute, Graduate School of Science, University of Tokyo,  
6                    Bunkyo-ku, Tokyo, Japan

7                    2 Department of Basic Science, 3 Research Center for Complex Systems Biology,  
8                    Graduate School of Arts and Sciences, University of Tokyo, Meguro-ku, Tokyo, Japan

9                    4 Department of Biological Sciences, Graduate School of Science, University of  
10                    Tokyo, Bunkyo-ku, Tokyo, Japan

11  
12                    **Email:** [cssawai@mail.ecc.u-tokyo.ac.jp](mailto:cssawai@mail.ecc.u-tokyo.ac.jp) or [saito@ubi.s.u-tokyo.ac.jp](mailto:saito@ubi.s.u-tokyo.ac.jp)

## 13 14 15                    • **Abstract**

16                    Macropinocytosis is non-specific uptake of the extracellular fluid playing ubiquitous  
17                    roles in cell growth, immune-surveillance as well as virus entry. Despite its widespread  
18                    occurrence, it remains unclear how its initial cup-shaped plasma membrane extensions  
19                    forms without external physical support as in phagocytosis or curvature inducing proteins  
20                    as in clathrin-mediated endocytosis. Here, by developing a novel computational  
21                    framework that describes the coupling between bistable reaction-diffusion processes of  
22                    active signaling patches and membrane deformation, we demonstrate that protrusive force  
23                    localized to the edge of the patches can give rise to the self-enclosing cup structure  
24                    without further assumption of local bending or contraction. Efficient uptake requires an  
25                    appropriate balance between the patch size and the magnitude of protrusive force relative  
26                    to the cortical tension. Furthermore, our model exhibits a variety of known morphology  
27                    dynamics including cyclic cup formation, coexistence and competition between multiple  
28                    cups and cup splitting indicating that these complex morphologies self-organize through  
29                    mutually dependent dynamics between the reaction-diffusion process and membrane  
30                    deformation.

## 31 32                    • **Introduction**

33 Macropinocytosis is an evolutionarily conserved actin-dependent endocytic process (1)  
34 in which the extracellular fluid is taken up by internalization of micrometer-scale cup-  
35 shaped membrane ruffles (Fig. 1A). A wide range of cell types exhibits  
36 macropinocytosis either in a constitutive manner or under growth and other stimulating  
37 signals. Macropinocytosis is employed for nutrient uptake in Amoebae *Dictyostelium*  
38 (2) and certain cancer cells (3, 4). In immune cells, macropinocytosis plays a role in  
39 surveying foreign antigens (5–8). In neurons, macropinocytosis is also employed to  
40 regulate neurite outgrowth (9). Understanding the basis of these processes is of  
41 biomedical importance due to its link in tumor growth (3, 4), virus entry (10) and spread  
42 of prions related to neurodegenerative disease (11). Despite wide occurrence of these  
43 phenomena, however, the basic question regarding the very nature of the membrane  
44 deformation remains unanswered. The large-scale cup formation involves complex  
45 spatiotemporal regulations of signaling molecules and cytoskeletal machineries. Unlike  
46 the better-studied clathrin-coated pits, where membrane invagination of ~ 100 nm  
47 diameter is formed by clathrin assembly, macropinosome have no apparent coat  
48 structures and their size varies between 0.2 - 5 $\mu$ m in diameter (6, 12, 13). Furthermore,  
49 in contrast to phagocytic cup which extends along the extracellular particles (14, 15),  
50 there is no such support to guide the macropinocytic cups externally. These  
51 morphological and dynamical features distinct from other endocytic processes indicate a  
52 mechanism unique to macropinocytosis that remains to be elucidated.

53

54 The initial stage of cup formation is identifiable by formation and expansion of an active  
55 signaling patch in the plasma membrane that consists of intense accumulation of  
56 phosphatidylinositol (3,4,5) tris-phosphate (PIP3) and the active form of small GTPases  
57 such as Ras, Rap and Rac surrounded by an edge region enriched in F-actin, Arp2/3 and  
58 the Scar/WAVE complex (13, 16). For brevity, we shall refer to this region as ‘active  
59 patch’. Relative positioning of these factors remains affixed as the patches grow in size  
60 (Fig. 1A left). The edge of the active patches protrude outward up to several micrometers  
61 thus forming the rim of a cup which then curves inward to ingest extracellular fluid (Fig.  
62 1A middle). The resulting cup closes by membrane fusion to form a macropinosome (Fig.  
63 1A right) which further matures and fuse with lysosomes for degradation of incorporated  
64 extracellular solutes (16). The active patch is thought to self-organize by combination  
65 of autocatalytic activation of Ras and PIP3 production and their diffusion (17–20).

66 When observed in the ventral membrane along the substrate, active patches appear as  
67 traveling spots and waves - a hallmark of reaction-diffusion mediated pattern formation  
68 (17, 18, 21–23). Although these active patches appear to act as a prepattern or ‘template’  
69 for macropinocytic cup (24), little is known how these materialize into the formation of  
70 the cup itself.

71

72 In recent years, progress in theoretical and computational approaches have allowed one  
73 to address dynamical properties of cellular- and sub-cellular scale membrane deformation  
74 such as amoeboid motion, filopodia formation. Common to these modeling approaches  
75 is mathematical formulation that describes the underlying regulatory kinetics together  
76 with a moving boundary. This physico-chemical coupling makes the problem unique  
77 and challenging, since the very nature of highly deformable boundary requires elaborate  
78 techniques to solve the interface physics that are often computationally laborious and  
79 expensive. Many of the studies have focused on cases that can be approximated in one-  
80 and two-dimensional space including but not limited to formation of filopodia during  
81 axonal elongation (25), pseudopodium in ameboid migration (26), lamellipodia of fish  
82 keratocytes (27–29), while relatively few attempts have been made for 3 dimensional  
83 dynamics (30–32). Models of 2-D dynamics by the active patches constrained to the  
84 ventral (18) or the dorsal-side (19) of the plasma membrane has been analyzed. Given  
85 its geometry, understanding the full nature of membrane deformation in macropinocytosis  
86 poses a challenge that requires full 3-dimensional modeling with topological changes in  
87 membrane. In this paper, we propose and analyze a minimalistic 3-D model to address  
88 the relationship between the self-organizing active patches and the geometry of  
89 macropinocytic cup formation and closure. Our results indicate that relative simple rule  
90 of self-organization coupled with membrane protrusion can explain the entire sequence  
91 of the dynamics starting from patch expansion, cup formation to cup closure without  
92 further need for specialized machineries to regulate local curvature.

93

94

## 95 **Model**

96 We adopt a modeling strategy that combines two elementary processes: (i) deformation  
97 of the membrane and (ii) reaction-diffusion process of signaling molecules on the  
98 deformable membrane. To describe the membrane, we employ the phase-field method,

99 which allows one to simulate interfaces with complex geometry such as growing crystals  
100 (33, 34), vesicle coarsening or fission (35) as well as an overall shape of migratory cells  
101 (18, 20, 25, 27). The phase-field approach allows one to compute cellular membrane  
102 deformation on the order of micrometers in spatial scale and seconds to minutes in  
103 timescales, which is in contrast to nanometer-scale models that describe microsecond  
104 order phenomena (36). Here, an abstract field variable  $\phi$  is introduced to describe the  
105 cell interior region  $\phi = 1$  and the exterior region and  $\phi = 0$  (Fig. 1B).  $\phi$  is assumed  
106 to be continuous and varies sharply at the interface with finite width characterized by a  
107 small parameter  $\epsilon$ . Following previous studies (18, 27), here, we adopt the following  
108 equations (see SI Text for derivation)

$$109 \quad \tau \frac{\partial \phi}{\partial t} = \eta \left( \nabla^2 \phi - \frac{G'(\phi)}{\epsilon^2} \right) - M_V (V - V_0) |\nabla \phi| + F_{\text{poly}} |\nabla \phi|,$$

110 (1)

111 where  $G' = 16\phi(1 - \phi)(1 - 2\phi)$  and  $V = \int \phi d\mathbf{r}$ . The first term in the right hand side  
112 represents curvature-driven force associated with surface tension  $\eta$ . The second term  
113 imposes a constraint on the cell volume to  $V_0 = 4\pi R_0^3/3$  where  $R_0$  is the cell radius and  
114  $M_V$  is a constraint parameter. The third term describes the force normal to the interface  
115 driven by dendritic actin polymerization. The magnitude of force  $F_{\text{poly}}$  is assumed to  
116 be a function of the local concentrations of signaling molecules as described below.

117  
118 For time development of the signaling molecule, let us assume an interconversion  
119 between the active form  $A$  on the plasma membrane and inactive cytosolic form  $B$ :  
120  $A \rightleftharpoons B$  (Fig. 1C). The total number of molecules is fixed to  $A_t$ , and the conversion  
121 from  $A$  to  $B$  is assumed to take place at a constant rate, whereas that of  $B$  to  $A$  is  
122 facilitated in an autocatalytic manner. This scheme gives rise to bi-stability, where  $A$   
123 takes two states: zero and a finite positive value. When  $A$  is locally perturbed from  
124  $A = 0$ , a domain where increase in  $A$  takes place spreads in space and eventually stops  
125 due to depletion of  $B$ , thereby creating a stable spot pattern which we shall consider as a  
126 mathematical representation of an active patch. Let us further introduce a factor  $I$  that  
127 inhibits conversion of  $B$  to  $A$  so that the active patch has a finite lifetime. The above  
128 basic reactions are expressed in the following dimensionless reaction-diffusion equations  
129 (see SI Text for derivation):

$$130 \quad \frac{\partial A}{\partial t} = \frac{A^2 B}{1 + A^2/\alpha^2} \frac{1}{1 + I} - A + D_A \nabla^2 A$$

131 (2)

$$132 \quad \frac{\partial I}{\partial t} = k_1 A^2 - k_2 I + D_I \nabla^2 I$$

133 (3)

134 where  $D_A$  and  $D_I$  are diffusion constants of  $A$  and  $I$  molecules, respectively. The  
 135 parameter  $\alpha$  dictates a half saturation concentration of the Hill function in the  
 136 autocatalytic reaction  $B \rightarrow A$ . The second equation assumes a negative feedback that  
 137 produces the inhibitor  $I$  at the rate  $k_1 A^2$  and degraded at a constant rate  $k_2$ . When  
 138 diffusion of  $B$  molecule is sufficiently fast,  $B = A_t/S - \langle A \rangle$ , where  $S$  is the cell surface  
 139 area  $S = \int \psi/\epsilon \, dr^3$  and  $\langle A \rangle$  is the total of  $A$  divided by  $S$ . Note that ‘ $A$ ’ and ‘ $B$ ’ can  
 140 also be membrane-bound factors as long as diffusion of ‘ $B$ ’ is sufficiently fast compared  
 141 to that of ‘ $A$ ’. For  $I = 0$  and  $k_1 = 0$ , the reaction-diffusion equations are reduced to  
 142 the well-studied wave pinning model of cell polarization (37, 38).

143

144 To define spatial coordinates occupied by the plasma membrane, let us introduce an  
 145 auxiliary phase-field  $\psi = (1 + e^{-\beta(\phi(1-\phi)-\theta)})^{-1}$  which specifies the interface between  
 146 cell exterior ( $\phi = 0$ ) and interior ( $\phi = 1$ ) region.  $\psi$  takes constant value  $\psi = 1$  at the  
 147 cell membrane and  $\psi = 0$  elsewhere (Fig. 1B). Here,  $\beta$  takes a sufficiently large  
 148 value so as to render the interface between inside and outside of the membrane sharp.  $\theta$   
 149 is set so that the  $\psi$  is non-zero at the interface of  $\phi$  with thickness  $\epsilon$ . The unique  
 150 aspect of the present approach is the introduction of this auxiliary field  $\psi$  thereby  
 151 allowing Eqs. (2) and (3) to be solved numerically at the interface only. In contrast,  
 152 previous 2D models (18, 27, 28) made distinction only between occupied (cell;  $\phi = 1$ )  
 153 and vacant (no-cell;  $\phi = 0$ ) regions and assumed reaction that take place throughout the  
 154 occupied space. Using  $\psi$ , we arrive at the following equations:

$$155 \quad \frac{\partial}{\partial t} \psi A = -\nabla \cdot (\psi A \mathbf{v}) + \psi \left[ \frac{A^2 B}{1 + A^2/\alpha^2} \frac{1}{1 + I} - A \right] + D_A \nabla \cdot (\psi \nabla A)$$

156 (4)

$$157 \quad \frac{\partial}{\partial t} \psi I = -\nabla \cdot (\psi I \mathbf{v}) + \psi [k_1 A^2 - k_2 I] + D_I \nabla \cdot (\psi \nabla I)$$

158 (5)

159

160 where the first terms in the right hand side are the advection term and  $\mathbf{v}$  is given by

$$161 \quad \mathbf{v} = - \left[ \frac{\eta \left( \nabla^2 \phi - \frac{G'(\phi)}{\epsilon^2} \right)}{|\nabla \phi|} - M_V (V - V_0) + F_{\text{poly}} \right] \frac{\nabla \phi}{|\nabla \phi|},$$

162 (6)

163

164 Given that protrusive actin filaments are concentrated at the edge of the activated patch  
 165 (16, 24), we assume that protrusion is facilitated when  $A$  is within a certain range as  
 166 illustrated in Fig. 1D. To implement this, the actin-dependent force generation in Eq. (1)  
 167 and (6) are given as in the form of the force term

$$168 \quad F_{\text{poly}}(A(\mathbf{r})) = F \frac{(A/K_1)^{n_h}}{1 + (A/K_1)^{n_h}} \frac{1}{1 + (A^2/K_2)^{n_h}}$$

169 (7)

170 so that  $F_{\text{poly}}(A) \sim F$  for  $K_1 \lesssim A \lesssim \sqrt{K_2}$ .

171

172

173

## 174 • Results

175 **Mutually dependency between the patch dynamics and deformation drives cup**  
 176 **formation and closure.** First, we demonstrate an overall time development of the 3-  
 177 dimensional model in the absence of the inhibitor by setting  $k_1 = 0$ . As an initial  
 178 condition, we chose a membrane sphere with  $A = I = 0$  except for a small circular  
 179 region with radius  $r_{\text{init}}$  where the local concentration of  $A$  takes random value from 0  
 180 to 5.0 on each grid. Representative results are shown in Fig. 2A (see also Movie S1).  
 181 Due to bistability, a local active patch defined by high  $A$  begin to invade the basal state  
 182 of low  $A$  as a propagating front (Fig. 2A  $t = 4$  orange region). As the patch expanded,  
 183 the membrane protruded at the patch periphery and formed a cup shaped circular  
 184 extension (Fig. 2A;  $t = 4 - 24$  orange and green border). After the patch grew to a certain  
 185 size, the expansion slowed down. At the same time, the protrusion formed an overhang  
 186 while the center of the patch curved slightly inward to form a cup (Fig. 2A;  $t = 24 - 44$ ).  
 187 The rim of the cup shrunk and annihilated as the membrane sealed itself to completely  
 188 surround a large volume of extracellular space (Fig. 2A;  $t = 65$ ). The coordinated  
 189 manner in which a circular ruffle encircling a non-protruding area extended, shrunk and

190 closed showed a close parallel to the cup dynamics observed in *Dictyostelium* (24). Also  
191 of note is the marked accumulation of  $A$  in the inner territory and its exclusion from the  
192 rim which are in good agreement with the patterns of bona fide active patch marker PIP<sub>3</sub>  
193 and Ras-GTP (24, 39–41).

194

195 Whether the cup closed or not depended on the parameters and the initial condition. Cup  
196 closure was judged by evaluating whether the region with  $\phi = 0$  surrounded by  $\phi = 1$   
197 based on quasi 3-dimensional simulations where dimensionality was reduced in an axis-  
198 symmetric coordinate for easier detection of morphology criteria and computation  
199 involving exhaustive parameter search (fig. S1A-H; see also Methods). In the phase field  
200 framework, the topological change that accompanies membrane fusion is naturally  
201 established by simply solving the partial differential equation Eq. (1) without additional  
202 numerical implementation. For enclosure of a large volume, the critical parameters  
203 were the ratio between force per unit area  $F$  and the surface tension  $\eta$  i.e.  $F/\eta$ , and the  
204 total amount of  $A$  and  $B$  per unit area  $a_t \equiv A_t/4\pi R_0^2$ . Figure 2B illustrates a phase-  
205 diagram for cup closure. Black regions represent parameters that were unable to support  
206 enclosure, otherwise color represents the enclosed volume relative to the cell volume  $V_0$   
207 (Fig. 2B). A similar portrayal of the parameter space was obtained based on the elapsed  
208 time between the patch initiation and the cup closure (fig. S2A) and the ingestion  
209 efficiency (fig. S2B). All phase diagrams were obtained by averaging results from two  
210 initial patch size  $r_{\text{init}}$  (fig. S2C, D). The parameter space could be divided into four  
211 domains: Phase I–IV based on the success rate of closure. Phase I includes the example  
212 shown in Figure 1A where parameters supported enclosure in all cases. Phase II consists  
213 of parameters where cup closure depended on the initial conditions. Here, due to small  
214 patch size, the cup and hence the enclosed extracellular volume was sometimes extremely  
215 small (Fig. 2C). In Phase IV, cup closure failed for all simulations runs (Fig. 2D, E).

216

217 Requirements for successful cup formation and closure (Phase I) can be understood from  
218 the characteristic dynamics observed when cups failed to support large volume uptake.  
219 Phase IV consisted of two patterns of incomplete closure depending on the value of  $F/\eta$ .  
220 When  $F/\eta$  was small, patches and cups persisted indefinitely without shrinking or  
221 closing (Fig. 2D) for both high and low  $a_t$ . At high  $F/\eta$ , cup shrunk without closing  
222 when  $a_t$  was not high (Fig. 2E). The behavior at low  $F/\eta$  was due to lack of



223 sufficient protrusive force for cup development. Consider a cross section of a protrusion  
224 with width  $2R$  (fig. S3), the force per unit length  $F$  exerted on the semicircular head of  
225 length  $l = \pi R$  should be twice as large as the line tension  $\eta$  required to maintain the  
226 protrusion. Hence, the minimal force  $F^*$  must obey  $F^*/\eta = 1/R = \pi/l$ . Based on  
227 cortical tension of  $\sim 0.7$  nN/ $\mu\text{m}$  (42) and an estimate for protrusive force  $\sim 6.5$  to  $9$   
228 nN/ $\mu\text{m}^2$  (protrusive force by a single microfilament 5 to 7 pN times the filament density  
229 (43)), the condition  $F/\eta > 1/R$  is satisfied for protrusion width of  $\gtrsim 0.2$   $\mu\text{m}$ . While  
230  $l$  in real cells has not been measured quantitatively, projections thinner than  $0.2$   $\mu\text{m}$   
231 would require larger  $F/\eta$  than the above estimate. Relative ease of imaging the cups  
232 under the conventional confocal microscope suggests they are above the diffraction limit  
233 ( $> 0.25$   $\mu\text{m}$ ) which is within this force requirement. Because the spatial resolution of  
234 our numerical simulations were limited by the computational time, for systematic  
235 parameter studies, parameters  $K_1$  and  $K_2$  in Eq. (7) were chosen so that  $l \sim 1.5$   $\mu\text{m}$   
236 (Fig. 1D, black plateau; fig. S3), hence  $F^*/\eta \sim 2.0$   $\mu\text{m}^{-1}$  which is consistent with the  
237 boundary in the phase diagram (Fig. 2B; red dashed line). In contrast to the force  
238 constraints at small  $F/\eta$ , the characteristic behavior at high  $F/\eta$  (Fig. 2E) was due to  
239 lack of sufficient patch size at small  $a_t$ . Here, the resulting small cups gave rise to high  
240 negative curvature which in turn provides strong restoring force in the inner territory that  
241 prevented the protrusion from curling inward. This resulted in a shmoo-like cell  
242 morphology (Fig. 2E,  $t = 70$ ) which eventually returned to symmetric sphere as the patch  
243 disappeared. This patch attenuation was a distinct feature that arose due to self-  
244 consistency requirement that the edge of the patch must define the point of protrusion and  
245 vice-versa. If protrusion were to come close and coalesce due to high tension, the region  
246 that it surrounded must also disappear. One should note that the same parameters support  
247 a persistent patch if it were not for deformation, thus the coupling of reaction-diffusion  
248 process and deformation is essential.

249

250 In Phase III, cup formation was observed to repeat at the same site. A similar behavior  
251 has been observed in the standard axenic strain of *Dictyostelium discoideum* and in an  
252 even more pronounced form in the null-mutant of RapGEF (*gflB*) (44). In our  
253 simulations, there were two patterns of repetition both of which occurred under conditions  
254 that allowed formation of exceedingly large cup (Figs. 2F and G). In the first examples  
255 (Fig. 2F; see also Movie S2), cup closed at its waist (Fig. 2F;  $t = 240$  sec) while the



256 remaining open half continued to expand at the edge (Fig. 2F;  $t = 356$ ). After the second  
257 closure (Fig. 2F;  $t = 492$ ), the rim disappeared and there was no more cup formation.  
258 The other pattern occurred for slightly weaker force (Fig. 2G; see also Movie S3). Here,  
259 cup closure was stalled in the middle (Fig. 2G;  $t = 296$ ) as the patch continued to expand  
260 laterally before the next attempt at the cup-formation (Fig. 2G;  $t = 400$ ). While  
261 distinction between these two behaviors is difficult to resolve experimentally, the  
262 markedly elongated cell shape (Fig. 2F;  $t = 492$  and Fig. 2G;  $t = 480$ ), and the lengthening  
263 of time required for enclosure (fig. S2A) are in accordance with what has been reported  
264 for the *gflB* mutant. The size of the Phase III region depended on the time scale of  
265 deformation  $\tau$ . In the examples shown above ( $\tau = 10$  sec), normal cup closure (Phase  
266 I) was predominantly observed, and Phase III was confined to a narrow domain between  
267 Phase I and IV (Fig. 2B). For smaller  $\tau$  ( $\tau = 5$  sec), Phase II became dominant, and  
268 Phase I and III were both confined to narrow regions in the parameter space (fig. S4A).  
269 In contrast, at large  $\tau$  ( $= 20$  sec), the Phase I and III regions expanded (fig. S4B).  
270 Overall, normal cup closure (Phase I) is realizable at large  $\tau$ , however it comes at the cost  
271 of also inviting repetitive dynamics that are often incomplete (Phase III) in addition to  
272 the overall process slowing down (fig. S4B middle) making the process less efficient (fig.  
273 S4B right).

274

275

### 276 **Inhibitor and mass conservation determines duration of the patch and cup dynamics.**

277 Large cell-size cups are frequently observed in the axenic strain of *Dictyostelium* (24, 40,  
278 45), however they do not exist indefinitely. The active signaling patches are mostly  
279 transient and eventually vanishes with a lifetime of few minutes (17, 18, 22, 23, 46). In  
280 our simulations, the active patches on their own have finite lifetime when the presence of  
281 the inhibitor  $I$  is non-negligible ( $k_1 \neq 0$ ). For  $k_1 = k_2 = 2.0 \times 10^{-4}$ , the inhibitor  $I$   
282 increases at a much slower timescale than the initial expansion of the active patch.  
283 Eventually,  $I$  becomes high enough to suppress  $A$  i.e. the activate patch (fig. S5) when  
284  $a_t$  satisfies a certain condition (see SI Text). In Phase III, the presence of the inhibitor  
285 repressed the repetitive cup formation and abolished the ruffle formation (fig. S5C and  
286 F), whereas no change was observed for Phase I and II.

287

288 Besides the inhibitor, the assumed mass conservation of the signaling molecule can also  
289 prevent futile formation of excessively large cup. This effect becomes most evident  
290 when there are simultaneous and constitutive occurrence of active patches. Let us  
291 examine slightly complex situations where activation of  $A$  is allowed to occur at random  
292 positions  $\mathbf{x}_c$  at rate  $\theta$  per volume. The spatial profile of noise follows  $\mathcal{N}(\mathbf{x}) =$   
293  $\mathcal{N}_0 \times \exp\left(-\frac{|\mathbf{x}-\mathbf{x}_c|^2}{2d^2}\right)$ , where  $d$  is the initial nucleation size, and  $\mathcal{N}_0$  is the noise  
294 intensity that follows an exponential distribution with the average  $\sigma$ . Figure 3A shows  
295 representative snapshots from independent simulation runs (see also Movie S4). A new  
296 active patch was nucleated before existing cups closed thus allowing multiple cups to  
297 coexist. Depending on the size and amplitude of the noise, some cups closed successfully,  
298 while others shrunk and vanished before they can close. Incomplete closure occurred  
299 even when the same parameter supported closure for an isolated cup (Phase I). This  
300 can be explained by effective lowering of  $a_t$  available per cup. Due to continual cup  
301 formation and closure, the cell shape deviated markedly from the initial sphere and took  
302 complex and processive morphology that highly resembled axenic strains of  
303 *Dictyostelium*. In the parameter regime that supported relative large and slow cup  
304 closure (Phase III), these features became more exaggerated (Fig. 3B). Multiple cups  
305 were indeed frequently observed in *Dictyostelium* cells, and they either successfully closed  
306 to form endosomes or vanished without closing (40).

307

308 **Excitability arises in the presence of strong inhibitory signal and drives cup splitting**  
309 **dynamics.** The cup dynamics described above was monotonous, meaning that the  
310 initial active patch more or less dictated when and where a cup formed, and it grew due  
311 to bistability until it consumed all  $B$ . In *Dictyostelium*, however, cups are known to  
312 also multiply or reduce in number by splitting and coalescence of existing cups (24). In  
313 the present model, when the production of  $A$  is no longer a saturating function (large  $\alpha$   
314 in Eq. 2), the active patch (a region with high  $A$ ) can become out of phase with a high  $I$   
315 region. As a consequence, the region occupied by high  $I$  will trail behind a moving  
316 active patch and can disrupt it (fig. S6A, B). To study this behavior in detail, let us  
317 consider a case  $\alpha \rightarrow \infty$  so that Eq.(2) now becomes

318 
$$\frac{\partial A}{\partial t} = \frac{A^2 B}{1 + I} - A + D_A \nabla^2 A$$

319 (8)

320 which is the same equation introduced earlier as a part of a model for the patch dynamics  
321 in circular dorsal ruffle (19). The key difference in the present model, apart from  
322 incorporation of the membrane deformation, is that Eq. (8) is coupled to Eq. (3) with  
323 quadratic dependence on  $A$  which is essential for providing a rich behavior as follows.  
324 The equation has three different parameter regimes: mono-stable, bi-stable, and excitable  
325 (Fig. 4A, see also fig. S7A-C for finite  $\alpha$ ). In the excitable regime, null-cline analysis  
326 (Fig. 4B, left panel) shows that, for a small  $\langle A \rangle$  (i.e., for  $B > 2\sqrt{k_1/k_2}$ ), small  
327 perturbation from the fixed point  $A = 0$  gives rise to a large excitation of  $A$ . For large  
328  $\langle A \rangle$  (i.e., for  $B < 2\sqrt{k_1/k_2}$ : right panel in Fig. 4A), excitability disappears and  $A$  falls  
329 immediately to the basal state even when strongly perturbed. Interestingly, this in turn  
330 brings the system back to an excitable state hence  $A$  is again easily perturbed and  
331 brought transiently to a high level. In other words, depending on  $\langle A \rangle$  i.e. the total size  
332 of active patches, excitability is switched on and off in a sequential manner. This  
333 switching of excitability destabilizes the expanding front of active patches (fig. S6A),  
334 similar to splitting patches or waves observed in the ventral side of the plasma membrane  
335 (17, 18, 21–23).

336

337 When coupled to membrane deformation, however, a broad protrusive force profile in the  
338 region surround by a patch (fig. S6C and D;  $t = 8, 0 < r < 3$ ) smoothed out the fragmented  
339 active patches before daughter cups developed (fig. S6E and F). While this can be  
340 circumvented at small  $F$ , fragmented cups then failed to close due to lack of sufficient  
341 protrusion (fig. S6G). A recent CryoEM study of the ventral actin waves demonstrated  
342 that the form and alignment of actin filaments at the edge of the patch and those in the  
343 inner region are distinct and thus hints at the presence of debranching factors that trails  
344 behind the expanding edge (47). Such notion is line with sharp localization of  
345 Scar/WAVE complex at the edge of a patch (24) and depolymerization factor Coronin at  
346 the rear of the edge (Bretschneider et al 2009. Biophys J). To study such an effect in  
347 the model, let us modify the force term so that that  $I$  not only suppresses amplification of  
348  $A$  but also competitively inhibits force generation by  $A$ , so that

349 
$$F_{\text{poly}}(A(\mathbf{r}), I(\mathbf{r})) = F \frac{(A/K_1)^{nh}}{1+(A/K_1)^{nh}} \frac{1}{1+(I/K_2)^{nh}} \quad (9).$$

350 Note that the original form of  $F_{\text{poly}}$  (Eq. 7) is recovered when  $I$  is at the steady state;  
351 i.e.  $\dot{I} = 0$ , and  $D_I$  is negligible. The periphery of the active patch is defined by high  
352  $A$  and low  $I$ , thus under Eq. (9), the force profile became restricted to the edge (fig. S6H,  
353  $I$ ;  $t = 8$ ). Protruding force in the inner territory only appeared later to surround the split  
354 patches (fig. S6H;  $t = 15$ ). Accordingly, expanding active patches broke up repeatedly  
355 while some of the daughter patches quickly merged with existing ones and gave rise to  
356 cup-shaped circular ruffles (Fig. 4D;  $t = 20, 28$ , and Movie S5). By ruffles, we mean  
357 that the rim of cup was no longer smooth and circular but more undulated and complex  
358 in shape. Splitting of an activate patch during ruffle formation causes its fragmentation  
359 (Fig. 4D;  $t = 36$ ). A notable difference from multiple cups occurring in non-excitable  
360 regime (Fig. 3) was that multiple patches and cups continued to emerge starting from a  
361 single founder. These sequence of events and their appearance; splitting followed by  
362 formation of cup-shaped ruffles (Fig. 2D) are remarkably similar to how, in *Dictyostelium*,  
363 an active Rac and F-actin rich region expands together with membrane ruffles then  
364 become fragmented into multiple macropinocytic cups (24).

365

366

## 367 Discussion

368 The present work suggests an unexpectedly simple yet concerted mechanism that  
369 underlies formation and closure of macropinocytic cups. First, a locally activated  
370 signaling patch represented by high  $A$  in the model appears. The active patch expands  
371 in a self-organized manner via autocatalytic transition of bistable nature from the state of  
372 low  $A$  to high  $A$ . From there, two key assumptions in the model dictate the fate of the  
373 patch and the resulting cup. (i) Growth of an activated patch is limited due to the finite  
374 amount of the signaling molecules (Eq. (2)); i.e. the sum of  $A$  and  $B$  molecules  $A_t$  (or  
375  $a_t$  in the normalized form) is fixed within a cell. (ii) Protruding force is restricted to  
376 the edge of an active patch (Eq. (7) and (9)) (16, 48). Due to the constraint (i), a patch  
377 first expands (fig. S8;  $t = t_1$ ), then slows down as it reaches its size limit (fig. S8;  $t = t_2$ ).  
378 The edge continues to protrude and forces the patch area to expand. However because  
379  $B$  is no longer available,  $A$  at the patch boundary must be brought down to the low state.  
380 Thus the position of the patch boundary (fig. S8;  $t = t_3$ , black circle) is effectively  
381 displaced from the rim of a cup (fig. S8;  $t = t_3$ , blue asterisk) towards the inner territory  
382 (fig. S8;  $t = t_3$ ). Because protrusive force is generated at the patch boundary (ii), the

383 protrusion begins to curve inward, forming an overhang (fig. S8;  $t = t_4, t_5$ ) and continues  
384 to advance until they meet each other. We should note that spontaneous curvature is  
385 assumed to be negligible in the present formulation (Eq. (1)), and that the involution arises  
386 due to mutuality between the reaction-diffusion process and deformation dynamics in  
387 defining the position of the protrusion. In this light, the work brings to light a distinct  
388 mechanism of membrane invagination that contrasts with those driven by local curvature;  
389 e.g. formation of endocytic vesicles by clathrin (49) and BAR-domain containing proteins  
390 (50, 51).

391

392 The high similarity between the range of complex morphology dynamics observed in the  
393 present simulations and those in *Dictyostelium* cells suggest that the kinetics adopted in  
394 the current model captured the essence of the underlying regulation and the cell  
395 mechanics. The critical parameter that determined the occurrence of a patch and its size  
396 was  $a_t$ . Strong candidates for  $A$  and  $B$  are active and inactive form of small GTPase  
397 such as Ras, Rap and Rac or their upstream and downstream signaling partners such as  
398 PI3K which are all found enriched in the activated patch (24, 39, 52). PI3kinase requires  
399 Ras binding for its activity (53, 54) and thus the variable  $A$  may represent Ras in  
400 complex with PI3kinase or its product PIP3 and the variable  $B$  may be regarded as their  
401 inactive forms. In fibroblasts, microinjection of active Ras protein induces  
402 macropinocytosis (55). RasS mutation in *Dictyostelium* cells are known to inhibit  
403 macropinocytosis (39, 56). These perturbations can be understood from increasing or  
404 decreasing  $a_t$  and hence the size of the active patch. Due to non-dimensionalization in  
405 Eq. (2), lowering of  $a_t$  can also result from decrease in the autocatalytic reaction  $B \rightarrow$   
406  $A$  (see SI Text). The analysis is in line with a recent suggestion based on the observation  
407 of smaller patches and macropinosomes in PI3kinase mutants (24, 57) and in a double  
408 mutant of Akt/PkbA and PkbR1 (57) that there likely is a positive feedback loop between  
409 PIP3 production and its downstream PKB in *Dictyostelium* (57).

410

411 Apart from bi-stability, our model suggests that excitability arises when the self-  
412 amplification of  $A$  is less saturated (i.e., large  $\alpha$ ). In *Dictyostelium*, loss of Ras  
413 GTPase-activating protein (RasGAP) Neurofibromin (NF1) causes formation of  
414 oversized macropinosomes, increases fluid uptake and facilitates cell growth in liquid  
415 media (45). In our model, a decrease in RasGAP would correspond to lowering the

416 rate of reaction  $A \rightarrow B$ . Due to parameter non-dimensionalization in Eq. (2), not only  
417  $a_t$  but also  $\alpha$  increases in this case (see SI Text). Since elevation in  $\alpha$  brings the  
418 system to the excitable regime, attenuation of RasGAP makes it an ideal point of  
419 perturbation to enhance macropinocytosis; i.e. an increase in the number of patches due  
420 to splitting in addition to supporting a larger patch size. Both expression of activated  
421 Ras in the wild-type cell (41) and Ras-GAP mutation (45) are known to enhance fluid  
422 uptake. Our model assumes that the inhibitor  $I$  weakens autoregulatory amplification  
423 of  $A$ . From  $\dot{I} = 0$  at Eq. (3), one can see that  $I$  imposes saturation in the production  
424 of  $A$  even at high  $\alpha$ , and thus has a similar effect to changing  $\alpha$ . In addition,  $I$  acts  
425 critically for patch duration as well as for cup splitting (Fig. 4D). For large  $a_t$ , absence  
426 of the inhibitor  $I$  caused cup formation to repeat at the same site due to incomplete  
427 closure of an oversized cup (Fig. 2B; Phase III). Following the line of thoughts that  $A$   
428 maybe regarded as an activated form of small GTPase,  $I$  would be a factor that  
429 suppresses guanine nucleotide exchange factor (GEF)s. In line with the model behavior,  
430 a knockout of Ras/Rap GEF (GflB) does indeed repeat cup formation at the same site  
431 (44).

432  
433 For efficient uptake, the key mechanical parameter was the magnitude of protrusive force  
434 relative to that of the cortical tension. Our model predicts that high  $F/\eta$  should facilitate  
435 macropinocytosis, which is in line with increase in macropinocytosis under decreased  
436 membrane tension (58). Although the variable  $A$  and  $I$  are abstract and collective  
437 representation of regulatory factors, from the cell mechanics point of view, they must be  
438 closely linked to the nucleator Arp2/3 complex bound to the polymerizing actin (19), and  
439 a debranching factor such as coronin in complex with F-actin, respectively. Mass  
440 conservation of  $A+B$  in the model could hence be attributed to competition for limited  
441 supply of actin or nucleating factors (59–64). In line with the global constraint,  
442 macropinocytic cup formation is known to compete with pseudopod formation (40).  
443 Appearance of an active patch on one side of the plasma membrane excludes another  
444 patch from appearing on other locations (65). As for the variable  $I$ , its simulated profile  
445 (fig. S6B) is in line with that of coronin which trails behind the traveling actin waves (66).  
446 Apart from the role of  $I$  to inhibit amplification of  $A$  (Eq. 2), our model assumed  $I$  to  
447 increase by duplex of  $A$  (Eq. 3). In this regard,  $I$  can be regarded as a complex of  
448 coronin cross-linked with actin filaments (67, 68). In the activated patch, coronin may



449 mediate the switch in the orientation of the dendritic actin filaments from those facing the  
450 membrane to those that are parallel (47). Such change would lead to vanishing force in  
451 the direction normal to the membrane interface consistent with our assumption that the  
452 force generation by  $A$  is competitively attenuated by  $I$  (Eq. (9)).

453

454 The current framework should be applicable to other related form of membrane  
455 deformation. Dendritic cells exhibit numerous multi-layered membrane ruffles and  
456 macropinosomes (69, 70). Such coexistence of multiple internalized vesicles was rarely  
457 observed in the present simulation due to minimization of the global surface area assumed  
458 in the Allen-Cahn type phase-field equation (Eq. 1). Further exploration in the parameter  
459 space, specifically for large  $a_t$  and  $\alpha$ , with perhaps additional implementation to control  
460 the speed of the vanishing vesicles may uncover related morphological features. In some  
461 cancer cells, the dorsal side of the plasma membrane is covered by circular membrane  
462 ruffle associated with macropinocytosis (19, 22). This so-called “circular dorsal ruffles”  
463 (CDR) is initiated from a F-actin-rich circular projections on the dorsal cell surface.  
464 Similar to the present simulations, the ring region expands then contracts, then forms a  
465 cup-like structure. Restriction of the dynamics in the dorsal side can be explained in the  
466 presence of dorsal-ventral asymmetry in the parameter at Phase I (e.g., Fig. 2A). We  
467 should note, however, that because multiple macropinosomes can form within a single  
468 cup (19), there likely is an additional mechanism at play to form these smaller ruffles.  
469 Further extension of the model such as to incorporate local change in tension  $\eta$ , which  
470 likely depends on localized myosin I (71, 72) may help explain these dynamics. Spatial  
471 restriction of the patch-driven dynamics may also help explain ruffling with a linear  
472 geometry known in macrophages where membrane ruffles many near the cell edge fold  
473 back on itself to close the cup (6, 73). Spatially much finer filopodial projections that  
474 resemble a tent-pole are also known (8). Future work should address the relation  
475 between these distinct subcellular morphologies and the basic cup dynamics uncovered  
476 in this work.

477

## 478 **Methods**

### 479 **Numerical simulations**



480 Time evolution of equation for  $\phi$ ,  $A$  and  $I$  was numerically solved using the standard  
 481 explicit Euler method with mesh size  $dx = 0.1 \mu\text{m}$  and  $dt = 4.0 \times 10^{-4}$  sec. For  $A$   
 482 and  $I$ , instead of solving Eqs.(4) and (5) directly, we computed the following equations  
 483

$$\begin{aligned}
 \frac{\partial A}{\partial t} &= -\nabla \cdot (A\vec{v}) + D_A\beta(1-\psi)(1-2\phi)\nabla\phi\nabla A + D_A\nabla^2 A + \frac{A^2 B}{1+A^2/\alpha^2} \frac{1}{1+I} - A \\
 \frac{\partial I}{\partial t} &= -\nabla \cdot (I\vec{v}) + D_I\beta(1-\psi)(1-2\phi)\nabla\phi\nabla I + D_I\nabla^2 I + k_1 A^2 - k_2 I,
 \end{aligned}$$

485  
 486 which derives from the relation  $\psi = (1 + e^{-\beta(\phi(1-\phi)-\theta)})^{-1}$ . The above equations were  
 487 solved on all lattice sites above the cut-off threshold  $\psi > 10^{-3}$ , otherwise  $A$  and  $I$   
 488 were allowed to simply decay at a rate  $\gamma_2 = 10.0$  [sec $^{-1}$ ]. Likewise, the equation for  $\vec{v}$   
 489 in Eq.(6) is computed for all sites  $|\nabla\phi| > 10^{-3}$ , otherwise  $\vec{v} = 0$ . Note that,  
 490 immediately after the cup closure, the internalized cup shrinks and eventually vanishes  
 491 due to the surface tension which causes numerical instability due to an abrupt increase in  
 492  $A$  on the shrinking membrane. To avoid this instability, an upper limit was set to 50.0  
 493 for both  $A$  and  $I$ . All simulations were coded in C. Results of three-dimensional  
 494 simulations were visualized using OpenGL.

495

#### 496 **Volume evaluation of the enclosed extracellular space**

497 To reduce computation time, we considered a cell shape with z-axis symmetry so that the  
 498 simulations can be run in the quasi 3-dimensional space with the z axis-symmetric  
 499 coordinate (i.e., on a z-r plane). In this coordinate,  $\nabla^2$  and  $\nabla \cdot \vec{v}$  were replaced by  
 500  $\nabla^2 = r^{-1} \frac{\partial}{\partial r} (r \frac{\partial}{\partial r}) + \frac{\partial}{\partial z^2}$  and  $\nabla \cdot \vec{v} = \frac{1}{r} \frac{\partial}{\partial r} (r v_r) + \frac{\partial}{\partial z} v_z$ . The Neumann boundary condition  
 501  $\partial_r \phi = \partial_r A = \partial_r I = 0$  are applied at the boundary  $r = 0$ , whereas Dirichlet boundary  
 502 condition  $\phi = A = I = 0$  were applied for boundaries at  $z = 0, L_z$  and  $r = L_r$ , where  
 503  $L_z, L_r$  are the axial length of the system. The analysis consisted of two parts (fig. S1G,  
 504 H): (1) scoring of the membrane enclosing events (i.e., whether or not the region with  
 505  $\phi = 0$  that is enclosed by  $\phi = 1$  exists), and (2) estimating the enclosed volume at the  
 506 time of cup closure. For the first part, for each simulation time step, the number of  
 507 transition from  $\phi = 0$  to  $\phi = 1$  (red circles in fig. S1G) was counted along the line  $r =$   
 508  $\Delta r$  from  $(\Delta r, L_z)$  to  $(\Delta r, 0)$ . By definition, an enclosed region is present when this  
 509 number is 4 (fig. S1G, right panel) otherwise no closure (fig. S1G, left panel). The  
 510 enclosed volume was estimated at the time of closure by integrating the cross-sectional  
 511 disk (fig. S1H, left panel) or disk with a hole at the center (fig. S1H, right panel) at

512 constant  $z$  within  $z_b \leq z \leq z_t$ , where  $z_t$  and  $z_b$  are the first and second point at  
513 which  $\phi$  changed from  $\phi = 0$  to 1 (fig. S1H).

514

515

516

### 517 **Acknowledgments**

518 The authors thank Shuji Ishihara, Tetsuya Hiraiwa and Chikara Furusawa for helpful  
519 discussions. This work was supported by Japan Society for Promotion of Science (JSPS)  
520 Grant-in-Aid for Young Scientists JP18K13514 to NS, Japan Science and Technology  
521 Agency (JST) CREST JPMJCR1923, MEXT KAKENHI JP19H05801 to SS and in part  
522 by Joint Research by Exploratory Research Center on Life and Living Systems  
523 (ExCELLS) Grant 18-204, MEXT KAKENHI JP19H05416, JP18H04759 and  
524 JP16H01442; JSPS KAKENHI JP17H01812 and JP15KT0076 (to S.S.).

525

526

### 527 **Author Contributions**

528 NS and SS conceived the work. NS planned the project, formulated the model, wrote  
529 and run the programs and performed all analysis. SS oversaw the project, supervised  
530 the analysis and contributed to the interpretation of the results. NS and SS wrote the  
531 manuscript.

532

533

### 534 **References**

535

536

- 537 1. J. S. King, R. R. Kay, The origins and evolution of macropinocytosis. *Philos.*  
538 *Trans. R. Soc. B Biol. Sci.* **374** (2019).
- 539 2. U. Hacker, R. Albrecht, M. Maniak, Fluid-phase uptake by macropinocytosis in  
540 dictyostelium. *J. Cell Sci.* **110**, 105–112 (1997).
- 541 3. C. Commisso, *et al.*, Macropinocytosis of protein is an amino acid supply route  
542 in Ras-transformed cells. *Nature* **497**, 633–637 (2013).

- 543 4. J. J. Kamphorst, *et al.*, Human pancreatic cancer tumors are nutrient poor and  
544 tumor cells actively scavenge extracellular protein. *Cancer Res.* **75**, 544–553  
545 (2015).
- 546 5. C. C. Norbury, Drinking a lot is good for dendritic cells. *Immunology* **117**, 443–  
547 451 (2006).
- 548 6. S. Yoshida, A. D. Hoppe, N. Araki, J. A. Swanson, Sequential signaling in  
549 plasma-membrane domains during macropinosome formation in macrophages. *J.*  
550 *Cell Sci.* **122**, 3250–3261 (2009).
- 551 7. S. BoseDasgupta, J. Pieters, Inflammatory Stimuli Reprogram Macrophage  
552 Phagocytosis to Macropinocytosis for the Rapid Elimination of Pathogens. *PLoS*  
553 *Pathog.* **10** (2014).
- 554 8. N. D. Condon, *et al.*, Macropinosome formation by tent pole ruffling in  
555 macrophages. *J. Cell Biol.* **217**, 3873–3885 (2018).
- 556 9. H. Kabayama, *et al.*, Syntaxin 1B suppresses macropinocytosis and semaphorin  
557 3A-induced growth cone collapse. *J. Neurosci.* **31**, 7357–7364 (2011).
- 558 10. J. Mercer, A. Helenius, Virus entry by macropinocytosis. *Nat. Cell Biol.* **11**, 510–  
559 520 (2009).
- 560 11. J. J. Yerbury, Protein aggregates stimulate macropinocytosis facilitating their  
561 propagation. *Prion* **10**, 119–126 (2016).
- 562 12. L. J. Hewlett, A. R. Prescott, C. Watts, The coated pit and macropinocytic  
563 pathways serve distinct endosome populations. *J. Cell Biol.* **124**, 689–703  
564 (1994).
- 565 13. J. A. Swanson, Shaping cups into phagosomes and macropinosomes. *Nat. Rev.*  
566 *Mol. Cell Biol.* **9**, 639–649 (2008).
- 567 14. M. Herant, V. Heinrich, M. Dembo, Mechanics of neurophil phagocytosis:  
568 Experiments and quantitative models. *J. Cell Sci.* **119**, 1903–1913 (2006).
- 569 15. D. M. Richards, R. G. Endres, How cells engulf: A review of theoretical  
570 approaches to phagocytosis. *Reports Prog. Phys.* **80** (2017).
- 571 16. C. M. Buckley, J. S. King, Drinking problems: mechanisms of macropinosome  
572 formation and maturation. *FEBS J.* **284**, 3778–3790 (2017).
- 573 17. O. D. Weiner, W. A. Marganski, L. F. Wu, S. J. Altschuler, M. W. Kirschner, An  
574 actin-based wave generator organizes cell motility. *PLoS Biol.* **5**, 2053–2063  
575 (2007).

- 576 18. D. Taniguchi, *et al.*, Phase geometries of two-dimensional excitable waves  
577 govern self-organized morphodynamics of amoeboid cells. *Proc. Natl. Acad. Sci.*  
578 *U. S. A.* **110**, 5016–21 (2013).
- 579 19. E. Bernitt, H. G. Döbereiner, N. S. Gov, A. Yochelis, Fronts and waves of actin  
580 polymerization in a bistability-based mechanism of circular dorsal ruffles. *Nat.*  
581 *Commun.* **8** (2017).
- 582 20. S. Flemming, F. Font, S. Alonso, C. Beta, How cortical waves drive fission of  
583 motile cells. *Proc. Natl. Acad. Sci.*, 201912428 (2020).
- 584 21. T. Bretschneider, *et al.*, Dynamic Actin Patterns and Arp2/3 Assembly at the  
585 Substrate-Attached Surface of Motile Cells. *Curr. Biol.* **14**, 1–10 (2004).
- 586 22. T. Itoh, J. Hasegawa, Mechanistic insights into the regulation of circular dorsal  
587 ruffle formation. *J. Biochem.* **153**, 21–29 (2013).
- 588 23. M. Gerhardt, *et al.*, Actin and PIP3 waves in giant cells reveal the inherent length  
589 scale of an excited state. *J. Cell Sci.* **127**, 4507–4517 (2014).
- 590 24. D. M. Veltman, *et al.*, A plasma membrane template for macropinocytic cups.  
591 *Elife* **5**, 24 (2016).
- 592 25. S. Najem, M. Grant, A phase field model for neural cell chemotropism. *Epl* **102**,  
593 1–4 (2013).
- 594 26. A. Moure, H. Gomez, Computational model for amoeboid motion: Coupling  
595 membrane and cytosol dynamics. *Phys. Rev. E* **94**, 1–9 (2016).
- 596 27. D. Shao, W.-J. Rappel, H. Levine, Computational Model for Cell  
597 Morphodynamics. *Phys. Rev. Lett.* **105**, 108104 (2010).
- 598 28. D. Shao, H. Levine, W. J. Rappel, Coupling actin flow, adhesion, and  
599 morphology in a computational cell motility model. *Proc. Natl. Acad. Sci. U. S.*  
600 *A.* **109**, 6851–6856 (2012).
- 601 29. J. Lee, Insights into cell motility provided by the iterative use of mathematical  
602 modeling and experimentation. *AIMS Biophys.* **5**, 97–124 (2018).
- 603 30. E. Tjhung, A. Tiribocchi, D. Marenduzzo, M. E. Cates, A minimal physical  
604 model captures the shapes of crawling cells. *Nat. Commun.* **6**, 1–9 (2015).
- 605 31. S. E. J. Campbell, P. Bagchi, E. J. Campbell, As featured in : in the presence of  
606 obstacles † (2018) <https://doi.org/10.1039/c8sm00457a>.

- 607 32. M. D. Rueda-Contreras, J. R. Romero-Arias, J. L. Aragón, R. A. Barrio,  
608 Curvature-driven spatial patterns in growing 3D domains: A mechanochemical  
609 model for phyllotaxis. *PLoS One* **13**, 1–23 (2018).
- 610 33. A. Karma, W.-J. Rappel, Quantitative phase-field modeling of dendritic growth  
611 in two and three dimensions. *Phys. Rev. E* **57**, 4323–4349 (1998).
- 612 34. C. Beckermann, H.-J. Diepers, I. Steinbach, A. Karma, X. Tong, Modeling Melt  
613 Convection in Phase-Field Simulations of Solidificatio. *J. Comput. Phys.* **154**,  
614 468–496 (1999).
- 615 35. J. S. Lowengrub, A. Rätz, A. Voigt, Phase-field modeling of the dynamics of  
616 multicomponent vesicles: Spinodal decomposition, coarsening, budding, and  
617 fission. *Phys. Rev. E - Stat. Nonlinear, Soft Matter Phys.* **79**, 1–13 (2009).
- 618 36. M. Sadeghi, F. Noé, Large-scale simulation of biomembranes incorporating  
619 realistic kinetics into coarse-grained models. *Nat. Commun.* **11**, 2951 (2020).
- 620 37. Y. Mori, A. Jilkine, L. Edelstein-Keshet, Wave-pinning and cell polarity from a  
621 bistable reaction-diffusion system. *Biophys. J.* **94**, 3684–3697 (2008).
- 622 38. R. Diegmiller, H. Montanelli, C. B. Muratov, S. Y. Shvartsman, Spherical Caps  
623 in Cell Polarization. *Biophys. J.* **115**, 26–30 (2018).
- 624 39. O. Hoeller, *et al.*, Two distinct functions for PI3-kinases in macropinocytosis. *J.*  
625 *Cell Sci.* **126**, 4296–4307 (2013).
- 626 40. D. M. Veltman, M. G. Lemieux, D. A. Knecht, R. H. Insall, PIP3-dependent  
627 macropinocytosis is incompatible with chemotaxis. *J. Cell Biol.* **204**, 497–505  
628 (2014).
- 629 41. T. D. Williams, P. I. Paschke, R. R. Kay, Function of small GTPases in  
630 Dictyostelium macropinocytosis. *Philos. Trans. R. Soc. B Biol. Sci.* **374** (2019).
- 631 42. B. Álvarez-González, *et al.*, Three-dimensional balance of cortical tension and  
632 axial contractility enables fast amoeboid migration. *Biophys. J.* **108**, 821–832  
633 (2015).
- 634 43. V. C. Abraham, V. Krishnamurthi, D. Lansing Taylor, F. Lanni, The actin-based  
635 nanomachine at the leading edge of migrating cells. *Biophys. J.* **77**, 1721–1732  
636 (1999).
- 637 44. H. Inaba, K. Yoda, H. Adachi, The F-actin-binding RapGEF Gf1B is required for  
638 efficient macropinocytosis in Dictyostelium. *J. Cell Sci.* **130**, 3158–3172 (2017).

- 639 45. G. Bloomfield, *et al.*, Neurofibromin controls macropinocytosis and phagocytosis  
640 in Dictyostelium. *Elife* **2015**, 1–25 (2015).
- 641 46. G. Gerisch, B. Schroth-Diez, A. Müller-Taubenberger, M. Ecke, PIP3 waves and  
642 PTEN dynamics in the emergence of cell polarity. *Biophys. J.* **103**, 1170–1178  
643 (2012).
- 644 47. M. Jasnin, *et al.*, The Architecture of Traveling Actin Waves Revealed by Cryo-  
645 Electron Tomography. *Structure* **27**, 1211-1223.e5 (2019).
- 646 48. G. Bloomfield, R. R. Kay, Uses and abuses of macropinocytosis. *J. Cell Sci.* **129**,  
647 2697–2705 (2016).
- 648 49. M. Kaksonen, A. Roux, Mechanisms of clathrin-mediated endocytosis. *Nat. Rev.*  
649 *Mol. Cell Biol.* **19**, 313–326 (2018).
- 650 50. A. Frost, *et al.*, Structural Basis of Membrane Invagination by F-BAR Domains.  
651 *Cell* **132**, 807–817 (2008).
- 652 51. H. Noguchi, Membrane tubule formation by banana-shaped proteins with or  
653 without transient network structure. *Sci. Rep.* **6**, 1–8 (2016).
- 654 52. Y. Miao, *et al.*, Wave patterns organize cellular protrusions and control cortical  
655 dynamics. 1–20 (2019).
- 656 53. S. Funamoto, R. Meili, S. Lee, L. Parry, R. A. Firtel, Spatial and temporal  
657 regulation of 3-phosphoinositides by PI 3-kinase and PTEN mediates  
658 chemotaxis. *Cell* **109**, 611–623 (2002).
- 659 54. A. T. Sasaki, *et al.*, G protein-independent Ras/PI3K/F-actin circuit regulates  
660 basic cell motility. *J. Cell Biol.* **178**, 185–191 (2007).
- 661 55. D. Bar-Sagi, J. R. Feramisco, Induction of membrane ruffling and fluid-phase  
662 pinocytosis in quiescent fibroblasts by ras proteins. *Science (80-. ).* **233**, 1061–  
663 1068 (1986).
- 664 56. J. R. Chubb, A. Wilkins, G. M. Thomas, R. H. Insall, The Dictyostelium RasS  
665 protein is required for macropinocytosis, phagocytosis and the control of cell  
666 movement. *J. Cell Sci.* **113**, 709–719 (2000).
- 667 57. T. D. Williams, S. Y. Peak-Chew, P. Paschke, R. R. Kay, Akt and SGK protein  
668 kinases are required for efficient feeding by macropinocytosis. *J. Cell Sci.* **132**  
669 (2019).
- 670 58. J. Loh, *et al.*, An acute decrease in plasma membrane tension induces  
671 macropinocytosis via PLD2 activation. *J. Cell Sci.* **132** (2019).

- 672 59. T. A. Burke, *et al.*, Homeostatic actin cytoskeleton networks are regulated by  
673 assembly factor competition for monomers. *Curr. Biol.* **24**, 579–585 (2014).
- 674 60. A. J. Lomakin, *et al.*, Competition for actin between two distinct F-actin  
675 networks defines a bistable switch for cell polarization. *Nat. Cell Biol.* **17**, 1435–  
676 1445 (2015).
- 677 61. C. Suarez, D. R. Kovar, Internetwork competition for monomers governs actin  
678 cytoskeleton organization. *Nat. Rev. Mol. Cell Biol.* **17**, 799–810 (2016).
- 679 62. M. F. Carlier, S. Shekhar, Global treadmilling coordinates actin turnover and  
680 controls the size of actin networks. *Nat. Rev. Mol. Cell Biol.* **18**, 389–401 (2017).
- 681 63. A. Antkowiak, *et al.*, Sizes of actin networks sharing a common environment are  
682 determined by the relative rates of assembly. *PLoS Biol.* **17**, 1–25 (2019).
- 683 64. P. Bleicher, A. Sciortino, A. R. Bausch, The dynamics of actin network turnover  
684 is self-organized by a growth-depletion feedback. *Sci. Rep.* **10**, 1–11 (2020).
- 685 65. J. Helenius, M. Ecke, D. J. Müller, G. Gerisch, Oscillatory Switches of Dorso-  
686 Ventral Polarity in Cells Confined between Two Surfaces. *Biophys. J.* **115**, 150–  
687 162 (2018).
- 688 66. T. Bretschneider, *et al.*, The three-dimensional dynamics of actin waves, a model  
689 of cytoskeletal self-organization. *Biophys. J.* **96**, 2888–2900 (2009).
- 690 67. B. L. Goode, *et al.*, Coronin promotes the rapid assembly and cross-linking of  
691 actin filaments and may link the actin and microtubule cytoskeletons in yeast. *J.*  
692 *Cell Biol.* **144**, 83–98 (1999).
- 693 68. E. L. De Hostos, The coronin family of actin-associated proteins. *Trends Cell*  
694 *Biol.* **9**, 345–350 (1999).
- 695 69. A. De Baey, A. Lanzavecchia, The role of aquaporins in dendritic cell  
696 macropinocytosis. *J. Exp. Med.* **191**, 743–747 (2000).
- 697 70. M. Chabaud, *et al.*, Cell migration and antigen capture are antagonistic processes  
698 coupled by myosin II in dendritic cells. *Nat. Commun.* **6**, 1–16 (2015).
- 699 71. J. Dai, H. P. Ting-Beall, R. M. Hochmuth, M. P. Sheetz, M. A. Titus, Myosin I  
700 contributes to the generation of resting cortical tension. *Biophys. J.* **77**, 1168–  
701 1176 (1999).
- 702 72. H. Brzeska, H. Koech, K. J. Pridham, E. D. Korn, M. A. Titus, Selective  
703 localization of myosin-I proteins in macropinosomes and actin waves.  
704 *Cytoskeleton* **73**, 68–82 (2016).



- 705 73. N. Araki, T. Hatae, T. Yamada, S. Hirohashi, Actinin-4 is preferentially involved  
706 in circular ruffling and macropinocytosis in mouse macrophages: Analysis by  
707 fluorescence ratio imaging. *J. Cell Sci.* **113**, 3329–3340 (2000).  
708  
709  
710

711 **Main Figure legends**

712

713

714 **Fig.1: Macropinocytic cup formation and the model schematics.** (A) Time sequence  
715 of macropinocytic cup formation (left to right). A micrometer-scale membrane domain;  
716 “active patch” (red) enriched in small GTPases and phosphoinositides grows and expands  
717 in the plasma membrane. The Scar/WAVE complex is localized at the edge of a patch  
718 (black) (24). (B) Phase field  $\phi$  defines the state of position  $x$  in space; occupied ( $\phi = 1$ )  
719 or vacant ( $\phi = 0$ ). An auxiliary variable  $\psi$  is introduced to delineate the border ( $\psi =$   
720 1) i.e. the plasma membrane and the rest of the space ( $\psi = 0$ ). (C) The schematic diagram  
721 of the model reaction.  $A$  and  $B$  are active and inactive form of an active patch factor,  
722 respectively.  $I$  is a factor that suppresses the positive feedback amplification of  $A$  at  
723 the membrane. (D) The spatial profile of protruding force  $F_{\text{poly}}$  (Eq.(7)) is determined  
724 by the distribution of  $A$ . A representative data for a 2D-planar membrane ( $K_1 = 0.005$ ,  
725  $K_2 = 0.25$  and  $n_h = 3$ ).

726

727

728 **Fig.2 Membrane protrusion at the edge of an active patch is sufficient for the**  
729 **formation of the basic cup-like structure and its closure.** Simulation results: (A) a  
730 representative time course of the numerical simulations ( $F/\eta = 4.0$ ,  $a_t = 2.8$ ). The active  
731 patch (red;  $A\psi > 0$ ) and the membrane (green;  $\psi > 0$ ) shown as merged RGB images;  
732 birds-eye view (upper panels) and as cross sections along the median plane (lower panels).  
733 Asterisks indicate cup closure. (B) Phase diagram of the cup dynamics. Color bars  
734 indicate the volume of enclosure normalized by the cell size (blue to yellow). The cut-  
735 off volume for successful cup closure was set to  $< 10^{-5}$  (black). Averages of six  
736 independent simulation runs (three of each for  $r_{\text{init}} = 1.0 \mu\text{m}$  and  $1.5 \mu\text{m}$ ) are shown.  
737 Phase I and II: enclosure in all or part of the six trials, respectively. Phase III: repetitive  
738 cup formation. Phase IV: cup closure failed in all simulations runs. The red dashed line  
739 is the estimated minimal force  $F/\eta = 2.0$  required for protrusion. Parameter sets in (A)  
740 and (C-G) are indicated in the diagram. (C-G) Representative time course for (C)  
741  $F/\eta = 5.2$ ,  $a_t = 2.6$  (D)  $F/\eta = 1.6$ ,  $a_t = 2.8$ , (E)  $F/\eta = 3.2$ ,  $a_t = 2.5$ , (F)  $F/\eta = 2.8$ ,

742  $a_t = 2.8$ , (G)  $F/\eta = 2.4$ ,  $a_t = 2.7$ . Other parameters:  $\tau = 10$ ,  $D_a = 0.1$ ,  $\alpha = 1.0$ ,  $\varepsilon =$   
743  $0.8$ ,  $M_V = 5.0$ ,  $\beta = 100.0$ ,  $\theta = 0.105$ ,  $\eta = 0.5$ .

744

745

746 **Fig.3: Complex cell morphologies result from multiple stochastic patch initiation.**

747 (A, B) Representative snapshots from independent simulations with the same parameter  
748 sets as Fig. 2A and F ( $I = 0$ ). Top overhead view (upper panels) and the midline cross  
749 section (lower panels) with merged RGB images (Green: cell membrane ( $\psi > 0$ ). Red:  
750 active patches ( $A\psi > 0$ ). Noise parameters:  $\sigma = 8.0$ ,  $d = 15.0$ ,  $\lambda = 3 \times 10^{-5}$ .

751

752

753 **Fig.4: Presence of an inhibitor gives rise to cup splitting dynamics.** (A) Phase diagram

754 of chemical reaction Eq.(2) decoupled from deformation dynamics in the presence of  
755 inhibitor kinetics (Eq.(3)) for  $k_1 = 0.088$ . Depending on  $k_2$ , the system is bi-stable ( $k_2 >$   
756  $1$ ) (red region) or excitable ( $k_2 < 1$ ) (pink region). A single fixed point  $A = 0$  for  $a_t <$   
757  $2\sqrt{k_1/k_2}$  (white region) and three fixed points  $A = 0$ , and  $A^\pm = (B \pm$   
758  $\sqrt{B^2 - 4k_1/k_2})/(2k_1/k_2)$  for  $a_t > 2\sqrt{k_1/k_2}$  (pink and red regions).  $A = 0$ ; stable.  
759  $A^-$ ; unstable.  $A^+$ ; stable ( $k_2 > 1$ ) or unstable ( $k_2 < 1$ ). (B) Null-clines in the  
760 excitable regime for  $B > 2\sqrt{k_1/k_2}$  (left panel) and  $B < 2\sqrt{k_1/k_2}$  (right panel). Fixed  
761 points (Filled circle: stable. Open circle: unstable). Excitatory trajectories (red arrows)  
762 invoked by small perturbation to  $A = 0$ . (C, D) Representative dynamics ( $a_t = 1.985$ ,  
763  $k_1 = 0.088$ ,  $k_2 = 0.54$ ,  $D_a = 0.085$  and  $D_i = 0.11$ ) on a fixed spherical field (C) and  
764 deforming membrane (D) ( $\tau = 7.0$ ,  $F = 3.7$ ,  $K_1 = 0.01$ ,  $K_2 = 0.1$  and  $n_h = 5$ ). (E,  
765 F) Representative dynamics ( $a_t = 1.94$ ,  $k_1 = 0.088$ ,  $k_2 = 0.54$ ,  $D_a = 0.26$  and  
766  $D_i = 0.87$ ) on a fixed spherical field (E) and deforming membrane (F) ( $\tau = 20.0$ ,  $F =$   
767  $3.0$ ,  $K_1 = 0.086$ ,  $K_2 = 1.8$  and  $n_h = 3$ ). Other parameters are same as in Fig. 2.

768

Fig. 1

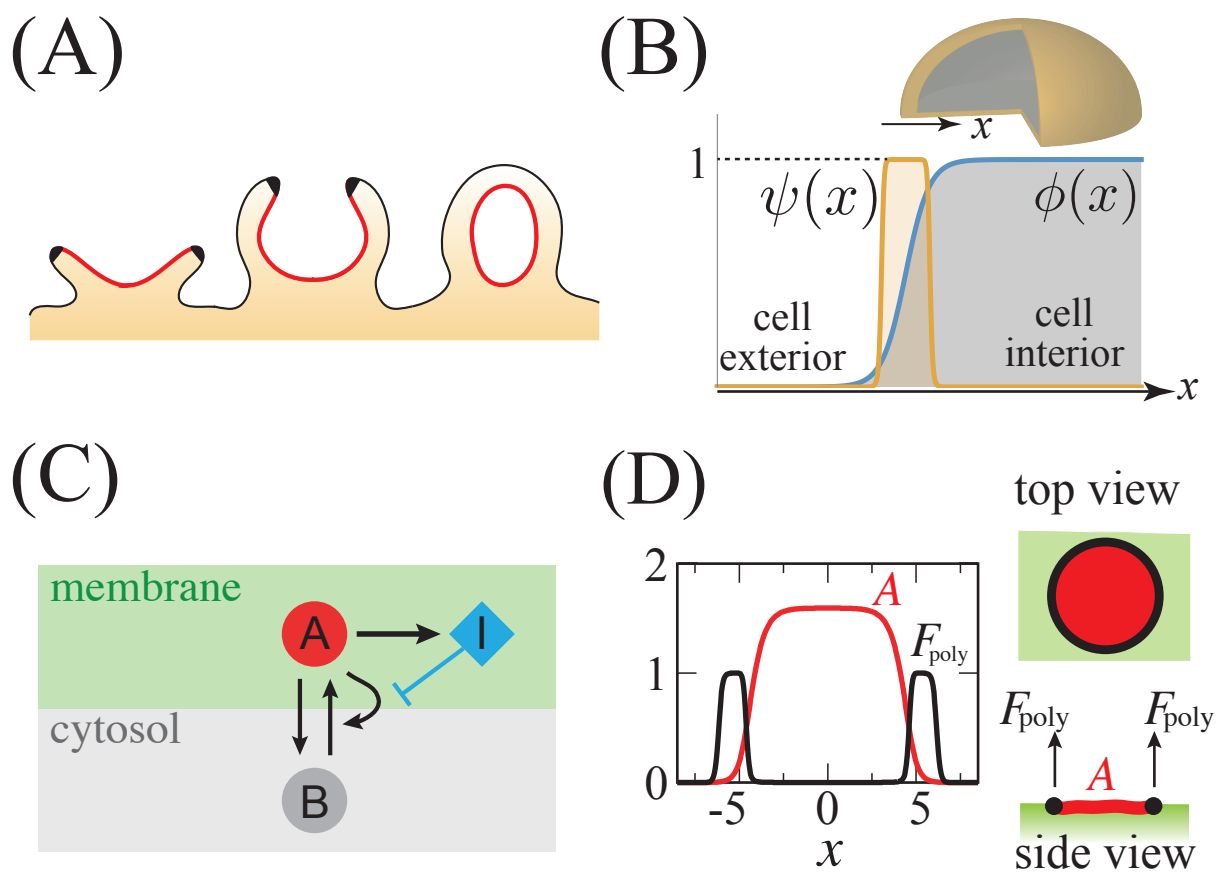

Fig. 2

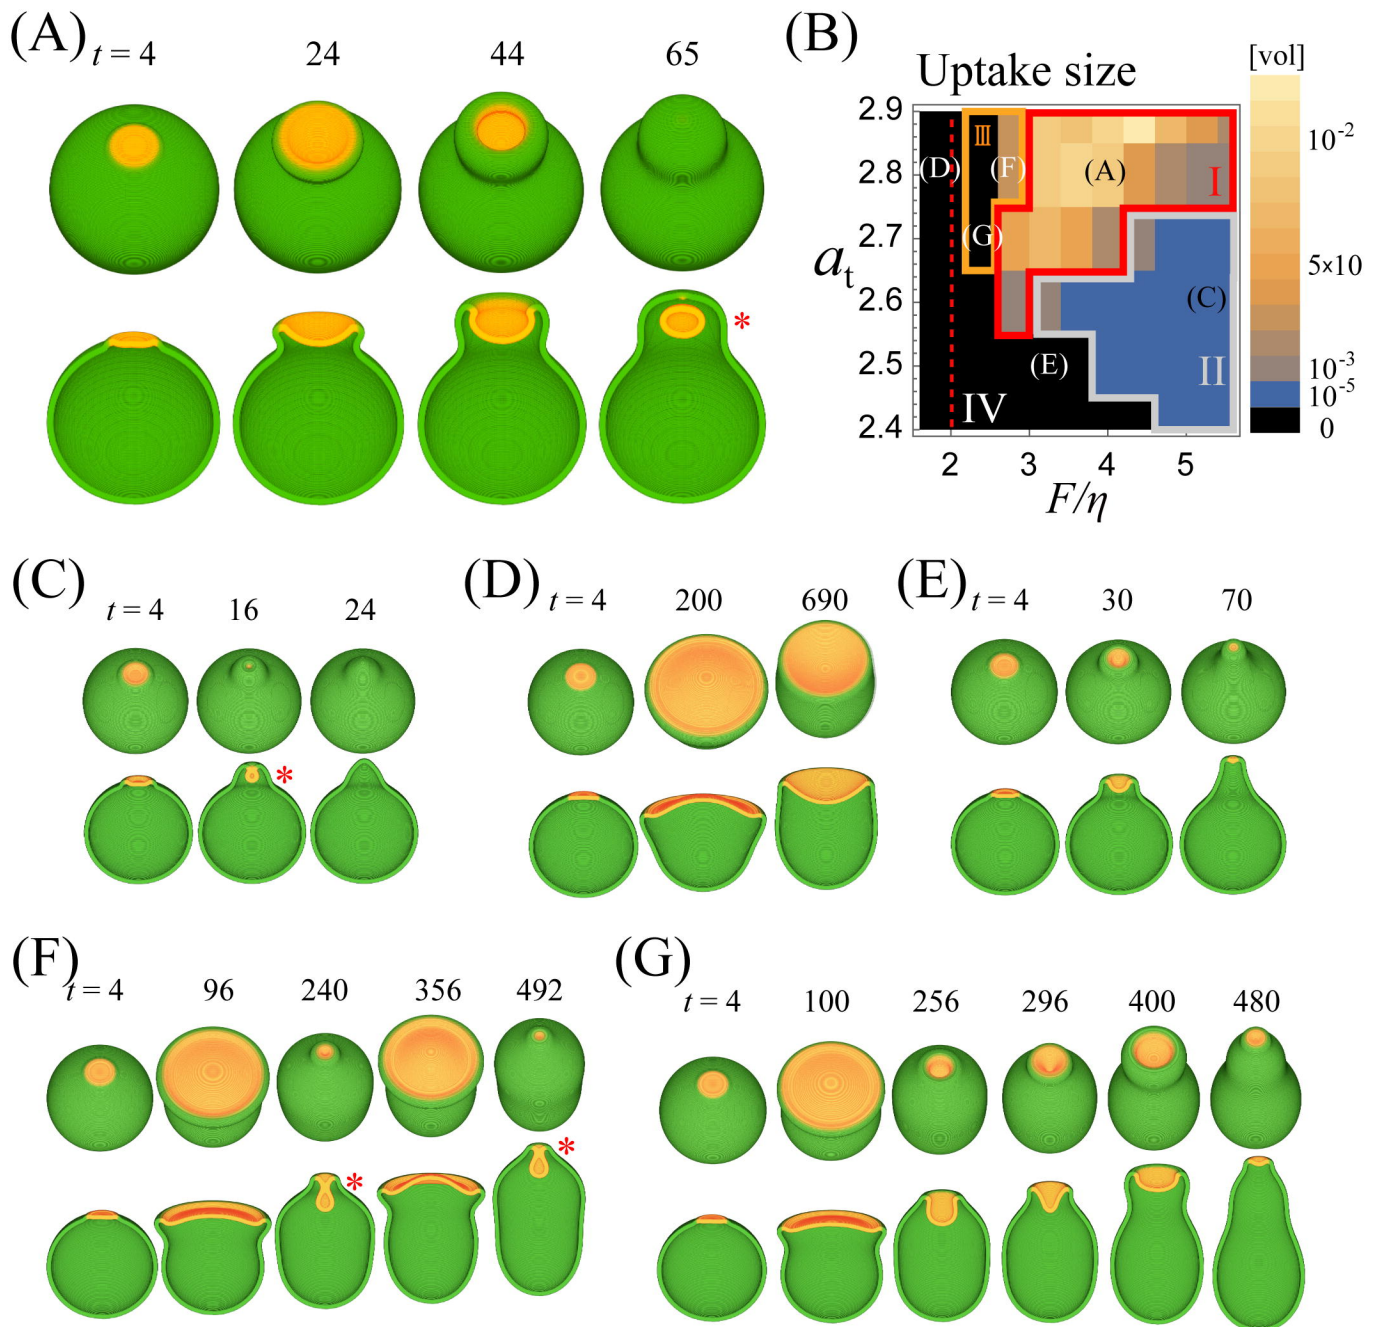

Fig. 3

(A)  $a_t = 2.8$   $F/\eta = 4.0$

top

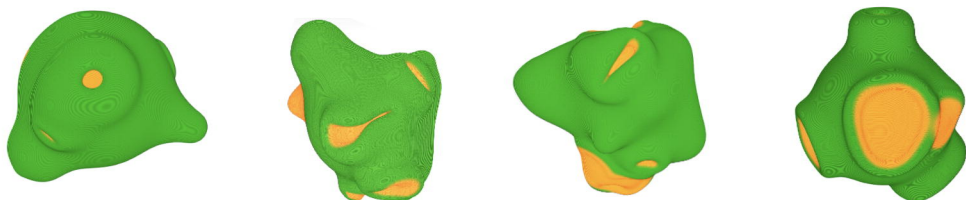

cross-section

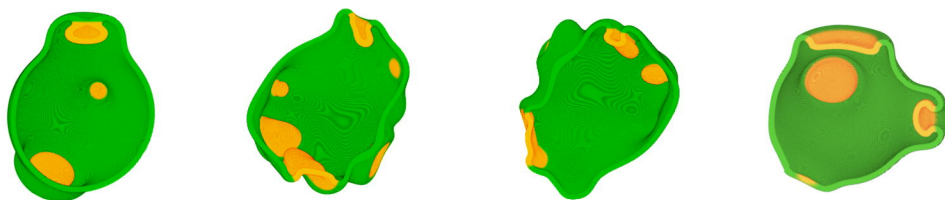

(B)  $a_t = 2.8$   $F/\eta = 2.8$

top

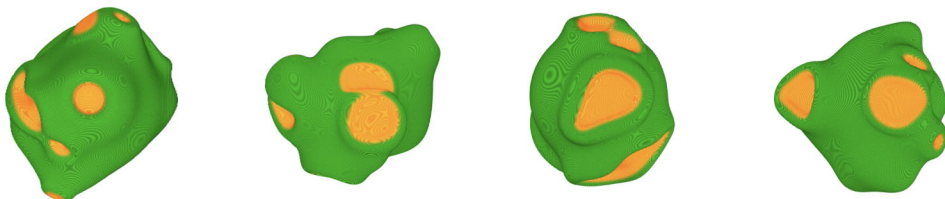

cross-section

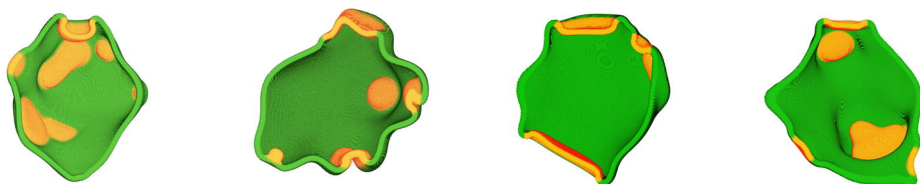



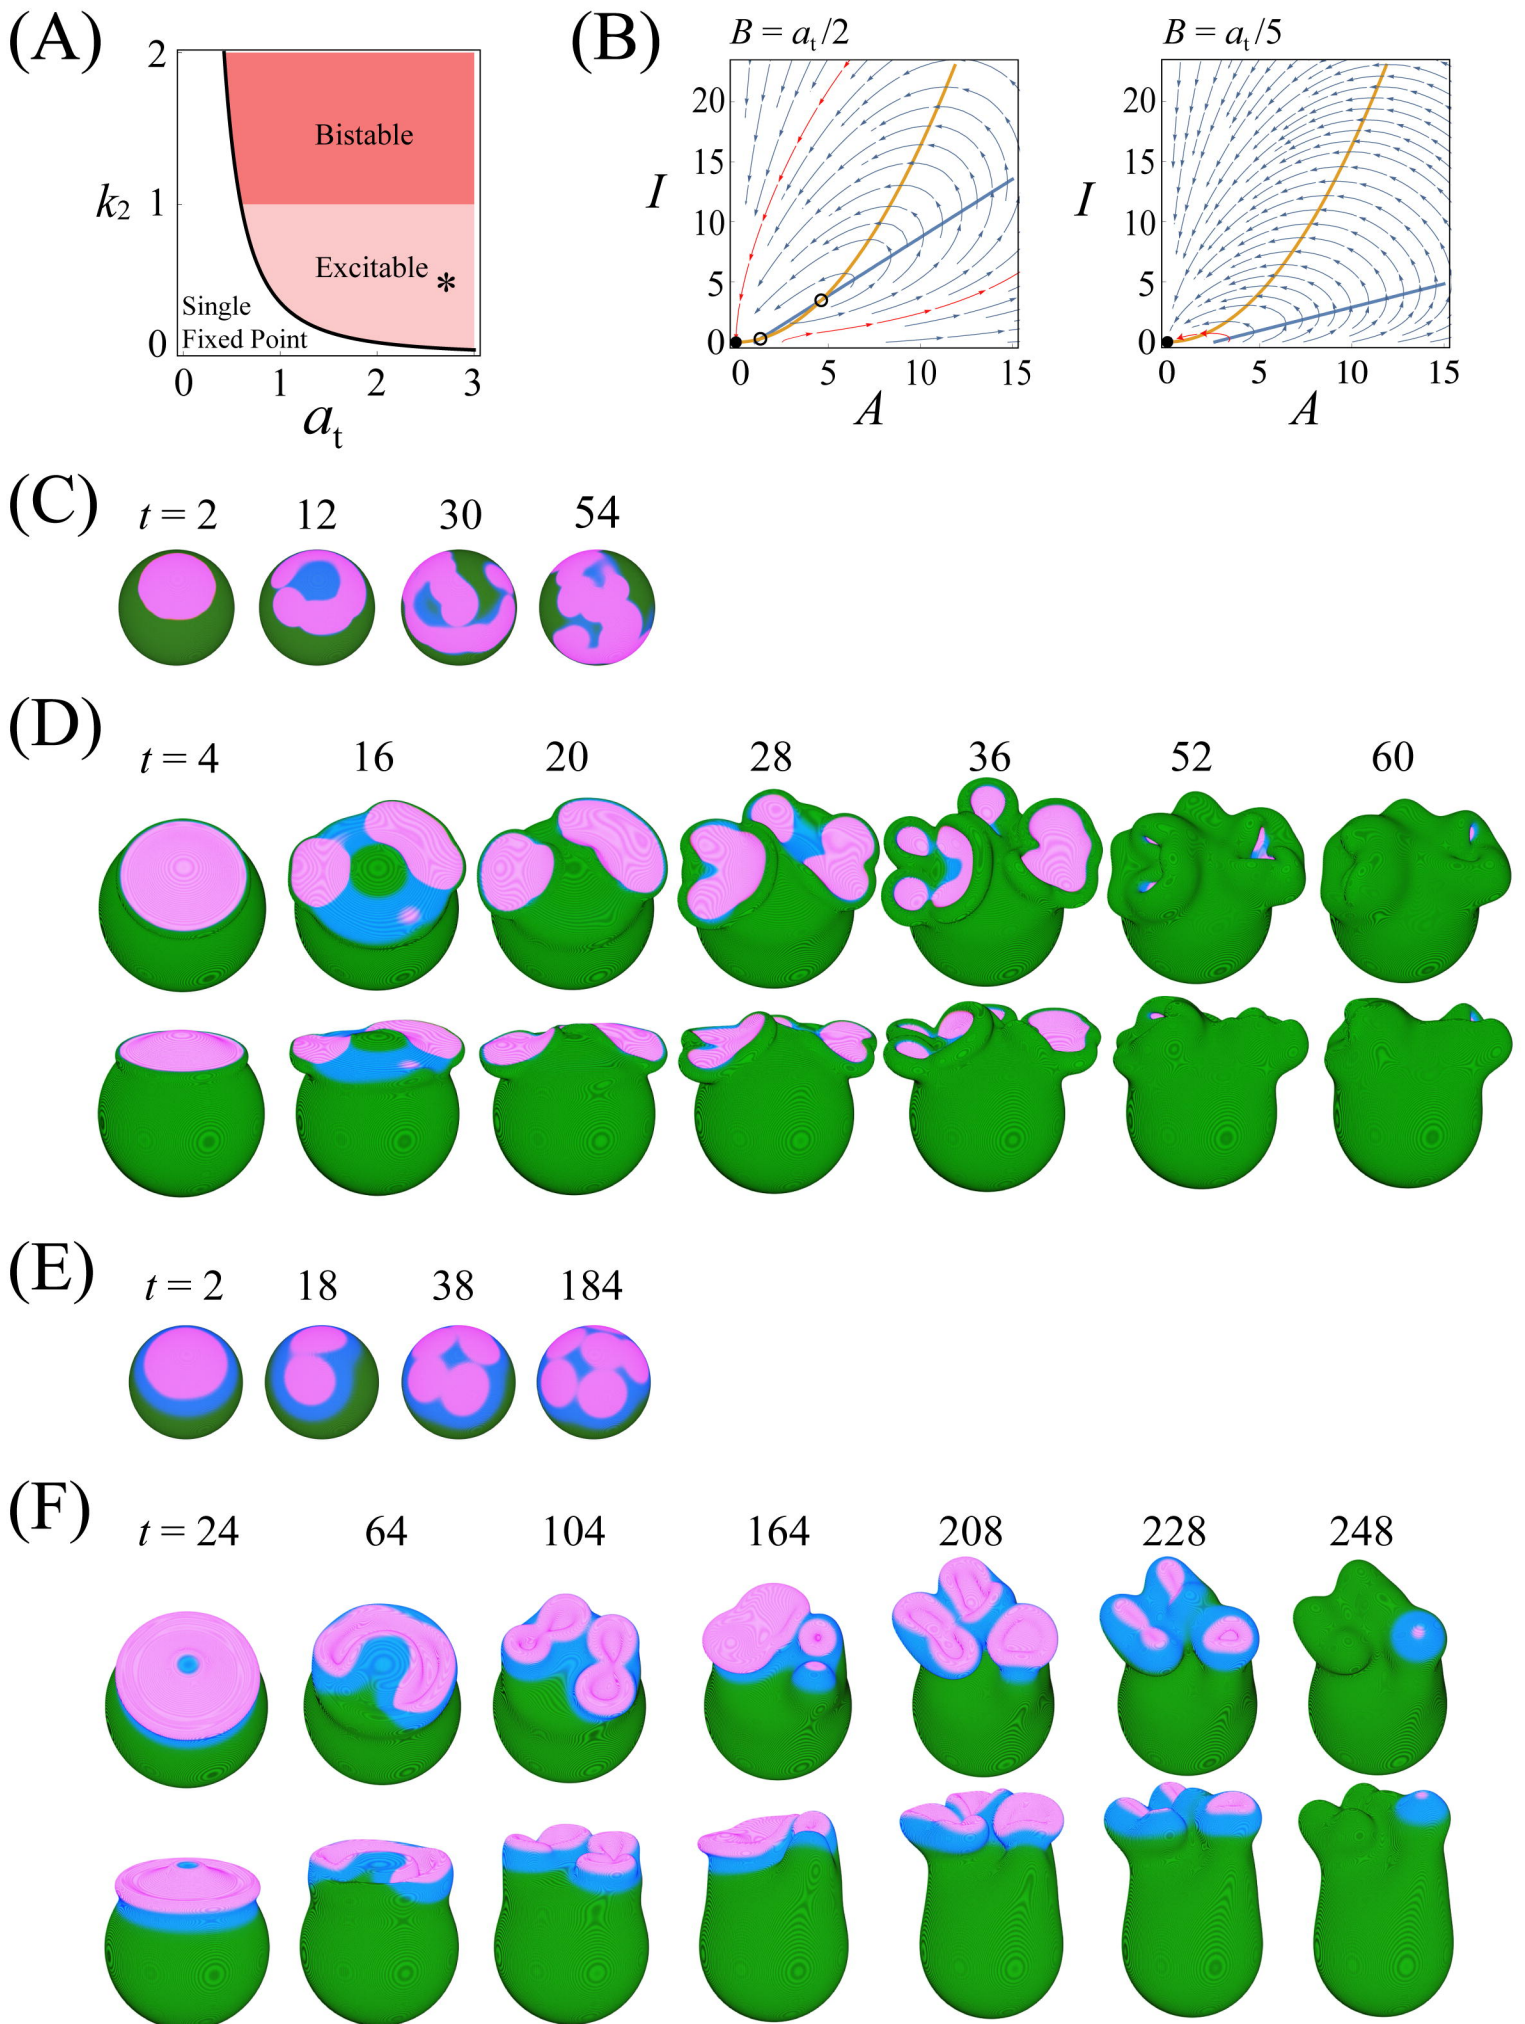

Source: https://www.biorxiv.org/content/10.1101/2020.06.22.165027v1.full.pdf
